# Supplementary material for: Prenatal Exposure to Parabens Affects Birth Outcomes through Maternal Glutathione S-Transferase (GST) Polymorphisms: From the Mothers and Kids Environmental Health (MAKE) Study
Source: PubMed Central journal article supplement (PMC7998485; doi:10.3390/ijerph18063012), 2021-03-15
Supplement: ijerph-18-03012-s001.pdf [file ijerph-18-03012-s001.pdf]

**Table S1.** General Characteristics of overall study and study population.

| Characteristics                        | N (%)       |                  |
|----------------------------------------|-------------|------------------|
|                                        | Total       | Study population |
| Total                                  | 236         | 177              |
| Maternal Age (years)                   |             |                  |
| <35                                    | 171 (72.46) | 125 (70.62)      |
| ≥35                                    | 65 (27.54)  | 52 (29.38)       |
| Pre-pregnancy BMI (kg/m <sup>2</sup> ) |             |                  |
| <25.0                                  | 202 (85.59) | 152 (85.88)      |
| ≥25.0                                  | 34 (14.41)  | 25 (14.12)       |
| Past history of alcohol consumption    |             |                  |
| Yes                                    | 189 (80.08) | 139 (78.53)      |
| No                                     | 47 (19.92)  | 38 (21.47)       |
| Past history of smoking                |             |                  |
| Yes                                    | 208 (88.14) | 159 (89.83)      |
| No                                     | 28 (11.86)  | 18 (10.17)       |
| Genotype                               |             |                  |
| GSTM1                                  |             |                  |
| Present                                | 129 (54.89) | 81 (45.76)       |
| Null                                   | 106 (45.11) | 96 (54.24)       |
| GSTT1                                  |             |                  |
| Present                                | 136 (57.87) | 83 (46.89)       |
| Null                                   | 99 (42.13)  | 94 (53.11)       |

**Table S2.** Regression model testing the main and interactive effects of paraben concentrations and GSTM1/GSTT1 genotype on birth outcomes <sup>a</sup>.

| Interaction                            | Birth Weight(g)     |                 | Gestational age(wks) |                 | Birth height(cm)    |                 |
|----------------------------------------|---------------------|-----------------|----------------------|-----------------|---------------------|-----------------|
|                                        | B (SE) <sup>a</sup> | <i>p</i> -Value | B (SE) <sup>a</sup>  | <i>p</i> -Value | B (SE) <sup>a</sup> | <i>p</i> -Value |
| GSTM1                                  |                     |                 |                      |                 |                     |                 |
| Methyl paraben                         | 252.686 (79.535)    | 0.002           | 0.472 (0.278)        | 0.091           | 0.429 (0.487)       | 0.380           |
| GSTM1 × methylparaben<br>p-interaction |                     | 0.002           |                      | 0.146           |                     | 0.065           |
| Ethyl paraben                          | 16.589 (80.016)     | 0.836           | 0.180 (0.272)        | 0.509           | -0.121 (0.48)       | 0.559           |
| GSTM1 × ethylparaben<br>p-interaction  |                     | 0.825           |                      | 0.623           |                     | 0.807           |
| propylparaben                          | 198.317 (80.109)    | 0.014           | 0.580 (0.275)        | 0.036           | 0.630 (0.480)       | 0.816           |
| GSTM1 × propylparaben<br>p-interaction |                     | 0.014           |                      | 0.041           |                     | 0.032           |
| GSTT1                                  |                     |                 |                      |                 |                     |                 |
| Methyl paraben                         | 49.655 (78.554)     | 0.528           | 0.194 (0.268)        | 0.469           | -0.085 (0.476)      | 0.859           |
| GSTT1 × methylparaben<br>p-interaction |                     | 0.602           |                      | 0.937           |                     | 0.770           |
| Ethyl paraben                          | 30.348 (82.709)     | 0.714           | 0.162 (0.281)        | 0.566           | 0.368 (0.501)       | 0.464           |
| GSTT1 × ethylparaben<br>p-interaction  |                     | 0.679           |                      | 0.672           |                     | 0.122           |
| propylparaben                          | 24.611 (81.418)     | 0.763           | 0.286 (0.277)        | 0.303           | -0.004 (0.48)       | 0.993           |
| GSTT1 × propylparaben<br>p-interaction |                     | 0.523           |                      | 0.543           |                     | 0.849           |

<sup>a</sup> Adjusted for mother's age, pre-pregnancy BMI, past history of alcohol consumption, past history of smoking and child's gestational age at delivery, gender, and parity. <sup>b</sup> Paraben concentrations were divided into 2 groups ( $\geq 75$ th percentile and  $< 75$ th percentile).
